# Supplementary material for: Compartment and cell-type specific hypoxia responses in the developing Drosophila brain
Source: PubMed Central journal article supplement (PMC7449796; doi:10.1242/bio.053629), 2020-08-18
Supplement: biolopen-9-053629-s1.pdf [file biolopen-9-053629-s1.pdf]

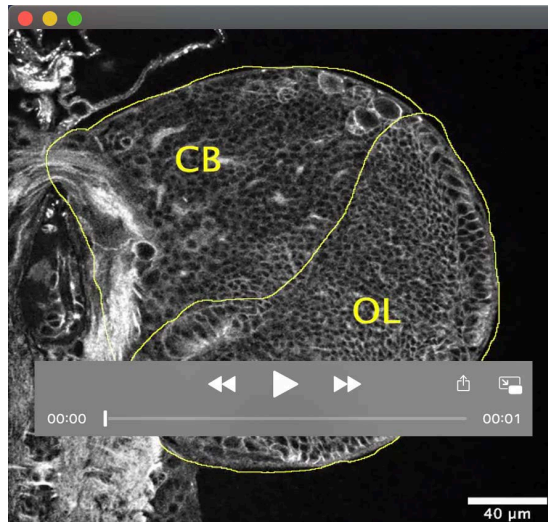

### Movie 1

Movie showing a brain confocal stack to illustrate the manual segmentation of the optic lobe compartment based on anti-Discs large staining.

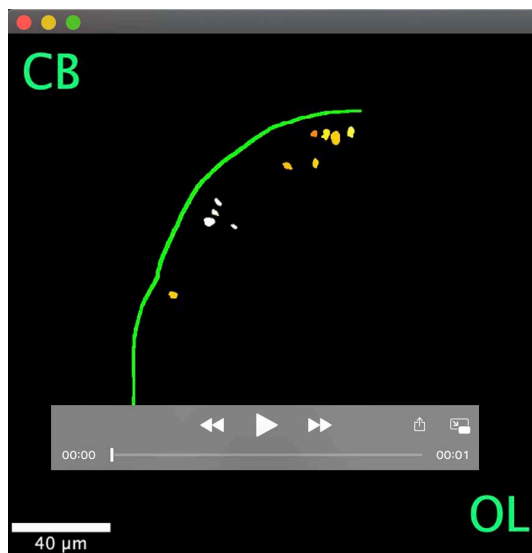

### Movie 2

Movie showing a brain confocal stack to reveal ratiometric values for Dpn positive neuroblasts and intermediate progenitor cells.
